# Supplementary material for: The value of incorporating patient-consulted medication reconciliation in influencing drug-related actions in the outpatient rheumatology setting
Source: Springer Nature journal article supplement (doi:10.1186/s12913-022-08391-7), 2022-08-05
Supplement: MOESM1 [file 23340910]

## Additional file 1: Data collection form

Date: .....-.....-.....

Patient number reported in HIX: .....

Informed consent: Yes/No

| General description of the consultation                                        |                                                                                                |             |
|--------------------------------------------------------------------------------|------------------------------------------------------------------------------------------------|-------------|
|                                                                                |                                                                                                |             |
| Drug-related action(s)                                                         | Used drug information:<br>Presence (P)<br>Strength (S)<br>Frequency (F)<br>Drug not in use (N) | Explanation |
|                                                                                | P:<br><br>S:<br><br>F:<br><br>N:                                                               |             |
|                                                                                | P:<br><br>S:<br><br>F:<br><br>N:                                                               |             |
| Additional questions asked by the rheumatologists to verify patient's drug use |                                                                                                |             |
|                                                                                |                                                                                                |             |
