# Supplementary material for: The value of incorporating patient-consulted medication reconciliation in influencing drug-related actions in the outpatient rheumatology setting
Source: Springer Nature journal article supplement (doi:10.1186/s12913-022-08391-7), 2022-08-05
Supplement: MOESM2 [file 23340910]

## Additional file 2: Assessment form for the expert panel

The left column of the table shows drug-related actions which can be performed by a rheumatologist during an outpatient visit. This concern changing current drugs (start, stop and change the frequency or strength of a current drug) or discuss drug-related problems.

Could you indicate which information (listed in column 2) is required to perform each drug-related action? Cases which are exceptions of these general assessment, will be discussed later.

| Drug-related action                                                        | Required information:                                                                                                                                                                                                                                                                                                |
|----------------------------------------------------------------------------|----------------------------------------------------------------------------------------------------------------------------------------------------------------------------------------------------------------------------------------------------------------------------------------------------------------------|
| <b>Start a drug</b>                                                        | <ul style="list-style-type: none"> <li>○ Knowledge of all drugs used by the patient? Yes / No</li> </ul>                                                                                                                                                                                                             |
| <b>Restart a drug</b>                                                      | <ul style="list-style-type: none"> <li>○ Knowledge that the drug was stopped? Yes / No</li> <li>○ Knowledge of all drugs used by the patient, if:               <ul style="list-style-type: none"> <li>○ Duration unknown or &gt; ..... weeks → Yes</li> <li>○ Duration &lt; ..... weeks → No</li> </ul> </li> </ul> |
| <b>Stop a drug</b>                                                         | <ul style="list-style-type: none"> <li>○ Usage of the concerning drug? Yes / No</li> </ul>                                                                                                                                                                                                                           |
| <b>Increase the strength of a drug</b>                                     | <ul style="list-style-type: none"> <li>○ Usage of the concerning drug? Yes / No</li> <li>○ The strength of the concerning drug? Yes / No</li> <li>○ The frequency of the concerning drug? Yes / No</li> </ul>                                                                                                        |
| <b>Decrease the strength of a drug</b>                                     | <ul style="list-style-type: none"> <li>○ Usage of the concerning drug? Yes / No</li> <li>○ The strength of the concerning drug? Yes / No</li> <li>○ The frequency of the concerning drug? Yes / No</li> </ul>                                                                                                        |
| <b>Increase the frequency of a drug</b>                                    | <ul style="list-style-type: none"> <li>○ Usage of the concerning drug? Yes / No</li> <li>○ The strength of the concerning drug? Yes / No</li> <li>○ The frequency of the concerning drug? Yes / No</li> </ul>                                                                                                        |
| <b>Decrease the frequency of a drug</b>                                    | <ul style="list-style-type: none"> <li>○ Usage of the concerning drug? Yes / No</li> <li>○ The strength of the concerning drug? Yes / No</li> <li>○ The frequency of the concerning drug? Yes / No</li> </ul>                                                                                                        |
| <b>Drug-related problem: the patient decided to stop using a drug</b>      | <ul style="list-style-type: none"> <li>○ Information that the drug was stopped (by the patient)? Yes / No</li> </ul>                                                                                                                                                                                                 |
| <b>Drug-related problem: the patient uses a drug other than prescribed</b> | <ul style="list-style-type: none"> <li>○ Usage of the concerning drug? Yes / No</li> <li>○ The strength of the concerning drug? Yes / No</li> <li>○ The frequency of the concerning drug? Yes / No</li> </ul>                                                                                                        |
| <b>Drug-related problem: the patient has a problem with intake or</b>      | <ul style="list-style-type: none"> <li>○ Usage of the concerning drug? Yes / No</li> <li>○ The strength of the concerning drug? Yes / No</li> </ul>                                                                                                                                                                  |

|                                                                                                                         |                                                                                                                                                                                                               |
|-------------------------------------------------------------------------------------------------------------------------|---------------------------------------------------------------------------------------------------------------------------------------------------------------------------------------------------------------|
| <b>administration of a drug</b>                                                                                         | <ul style="list-style-type: none"> <li>○ The frequency of the concerning drug? Yes / No</li> </ul>                                                                                                            |
| <b>Drug-related problem: the patient worried about a specific drug</b>                                                  | <ul style="list-style-type: none"> <li>○ Usage of the concerning drug? Yes / No</li> </ul>                                                                                                                    |
| <b>Drug-related problem: the patient worried about his/her drug or adverse drug reactions of their drugs in general</b> | <ul style="list-style-type: none"> <li>○ Usage of all drugs used by the patient? Yes / No</li> </ul>                                                                                                          |
| <b>Drug-related problem: the used drug is not effective</b>                                                             | <ul style="list-style-type: none"> <li>○ Usage of the concerning drug? Yes / No</li> <li>○ The strength of the concerning drug? Yes / No</li> <li>○ The frequency of the concerning drug? Yes / No</li> </ul> |
| <b>Injection administrated during the outpatient visit</b>                                                              | <ul style="list-style-type: none"> <li>○ Usage of the concerning drug? Yes / No</li> </ul>                                                                                                                    |
