# Supplementary material for: The value of incorporating patient-consulted medication reconciliation in influencing drug-related actions in the outpatient rheumatology setting
Source: Springer Nature journal article supplement (doi:10.1186/s12913-022-08391-7), 2022-08-05
Supplement: MOESM3 [file 23340910]

### Additional file 3: Items of the assessment form of the expert panel where consensus was reached

The left column of the table shows drug-related actions which can be performed by a rheumatologist during an outpatient visit. This concern changing current drugs (start, stop and change the frequency or strength of a current drug) or discuss drug-related problems.

The right column shows the required information to perform each drug-related action. The answers which were reported by each of the four members of the expert panel are filled in.

| Drug-related action                                                        | Required information:                                                                                                                                                                                                                          |
|----------------------------------------------------------------------------|------------------------------------------------------------------------------------------------------------------------------------------------------------------------------------------------------------------------------------------------|
| <b>Start a drug</b>                                                        | <ul style="list-style-type: none"> <li>○ Knowledge of all drugs used by the patient? Yes / <del>No</del></li> </ul>                                                                                                                            |
| <b>Stop a drug</b>                                                         | <ul style="list-style-type: none"> <li>○ Usage of the concerning drug? Yes / <del>No</del></li> </ul>                                                                                                                                          |
| <b>Increase the strength of a drug</b>                                     | <ul style="list-style-type: none"> <li>○ Usage of the concerning drug? Yes / <del>No</del></li> <li>○ The strength of the concerning drug? Yes / <del>No</del></li> <li>○ The frequency of the concerning drug? Yes / <del>No</del></li> </ul> |
| <b>Decrease the strength of a drug</b>                                     | <ul style="list-style-type: none"> <li>○ Usage of the concerning drug? Yes / <del>No</del></li> <li>○ The strength of the concerning drug? Yes / <del>No</del></li> <li>○ The frequency of the concerning drug? Yes / <del>No</del></li> </ul> |
| <b>Increase the frequency of a drug</b>                                    | <ul style="list-style-type: none"> <li>○ Usage of the concerning drug? Yes / <del>No</del></li> <li>○ The strength of the concerning drug? Yes / <del>No</del></li> <li>○ The frequency of the concerning drug? Yes / <del>No</del></li> </ul> |
| <b>Decrease the frequency of a drug</b>                                    | <ul style="list-style-type: none"> <li>○ Usage of the concerning drug? Yes / <del>No</del></li> <li>○ The strength of the concerning drug? Yes / <del>No</del></li> <li>○ The frequency of the concerning drug? Yes / <del>No</del></li> </ul> |
| <b>Drug-related problem: the patient decided to stop using a drug</b>      | <ul style="list-style-type: none"> <li>○ Information that the drug was stopped (by the patient)?<br/>Yes / <del>No</del></li> </ul>                                                                                                            |
| <b>Drug-related problem: the patient uses a drug other than prescribed</b> | <ul style="list-style-type: none"> <li>○ Usage of the concerning drug? Yes / <del>No</del></li> <li>○ The strength of the concerning drug? Yes / <del>No</del></li> <li>○ The frequency of the concerning drug? Yes / <del>No</del></li> </ul> |
| <b>Drug-related problem: the used drug is not effective</b>                | <ul style="list-style-type: none"> <li>○ Usage of the concerning drug? Yes / <del>No</del></li> <li>○ The strength of the concerning drug? Yes / <del>No</del></li> <li>○ The frequency of the concerning drug? Yes / <del>No</del></li> </ul> |
